# Supplementary material for: Effect of mesenchymal stem cells on the host response in severe community-acquired pneumonia
Source: PubMed Central journal article supplement — Thorax. 2024 Sep 25;79(11):e222026. doi: 10.1136/thorax-2024-222026 (PMC11503173; doi:10.1136/thorax-2024-222026), 2024-09-25
Supplement: thorax-79-11-s002.pdf [file thorax-79-11-s002.pdf]

# The effect of mesenchymal stem cells on the host response in severe community-acquired pneumonia

Reijnders TDY, et al. *Thorax* 2024. DOI: 10.1136/thorax-2024-222026

## Population

- 82 critically ill patients with sepsis due to community-acquired bacterial pneumonia

## Interventions

- Cx611: Adipose-derived mesenchymal stem cells
- Placebo

## Measurements

- 29 plasma protein biomarkers
- Blood transcriptomics

## Six time points:

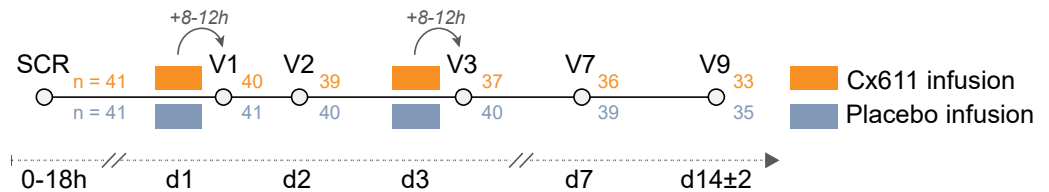

## Results

### Plasma proteins

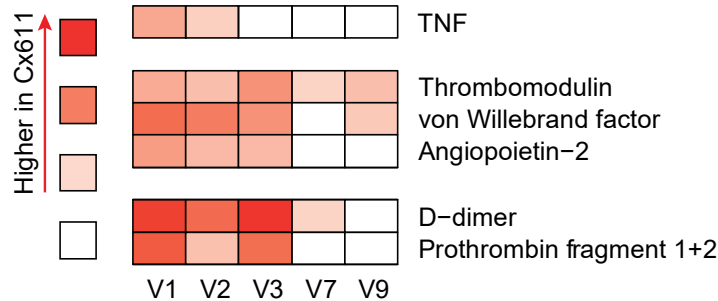

### Blood transcriptomics

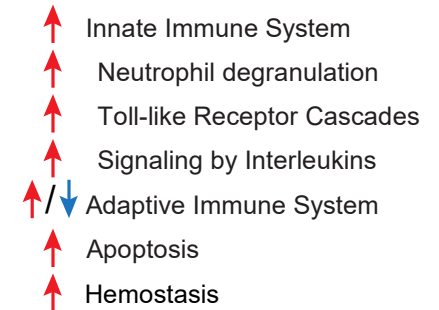

**Conclusion:** Mesenchymal stem cell infusion in patients with sepsis due to community-acquired bacterial pneumonia leads to increased endothelial and procoagulant plasma biomarkers, and increased gene expression in pathways related to innate immunity, haemostasis, and apoptosis.
